# Supplementary material for: Identification and validation of hub microRNAs dysregulated in esophageal squamous cell carcinoma
Source: PubMed Central journal article supplement (PMC7288914; doi:10.18632/aging.103245), 2020-05-15
Supplement: aging-12-103245-s001..pdf [file aging-12-103245-s001..pdf]

## SUPPLEMENTARY TABLES

Supplementary Table 1. Clinicopathological characteristics of ESCC patient samples (n=32).

| Characteristics              | No. of cases (%) |
|------------------------------|------------------|
| <b>Age (y)</b>               |                  |
| <65                          | 15 (46.9)        |
| ≥65                          | 17 (53.1)        |
| <b>Gender</b>                |                  |
| Male                         | 28 (87.5)        |
| Female                       | 4 (12.5)         |
| <b>TNM stage</b>             |                  |
| I                            | 6 (18.8)         |
| II                           | 13 (40.6)        |
| III                          | 13 (40.6)        |
| <b>T classification</b>      |                  |
| T1                           | 5 (15.6)         |
| T2                           | 9 (28.1)         |
| T3                           | 18 (56.3)        |
| T4                           | 0 (0)            |
| <b>N classification</b>      |                  |
| N0                           | 12 (37.5)        |
| N1                           | 17 (53.1)        |
| N2-NX                        | 3 (9.4)          |
| <b>Metastasis</b>            |                  |
| No                           | 32 (100)         |
| Yes                          | 0 (0)            |
| <b>Vascular invasion</b>     |                  |
| No                           | 25 (78.1)        |
| Yes                          | 7 (21.9)         |
| <b>Lymphatic invasion</b>    |                  |
| No                           | 13 (40.6)        |
| Yes                          | 19 (59.4)        |
| <b>Expression of miR-221</b> |                  |
| Low expression               | 16 (50)          |
| High expression              | 16 (50)          |

Supplementary Table 2. Correlation between miR-196a-5p expression and clinicopathologic characteristics of ESCC patients (n=32).

| Characteristics           | miR-196a-5p               |                            | p value      |
|---------------------------|---------------------------|----------------------------|--------------|
|                           | Low expression, no. cases | High expression, no. cases |              |
| <b>Age(y)</b>             |                           |                            |              |
| <65                       | 7                         | 8                          | 0.723        |
| ≥65                       | 9                         | 8                          |              |
| <b>Gender</b>             |                           |                            |              |
| Male                      | 15                        | 13                         | 0.285        |
| Female                    | 1                         | 3                          |              |
| <b>TNM stage</b>          |                           |                            |              |
| I                         | 2                         | 4                          | 0.488        |
| II                        | 8                         | 5                          |              |
| III                       | 6                         | 7                          |              |
| <b>T classification</b>   |                           |                            |              |
| T1                        | 5                         | 0                          | <b>0.020</b> |
| T2                        | 2                         | 7                          |              |
| T3                        | 9                         | 9                          |              |
| T4                        | 0                         | 0                          |              |
| <b>N classification</b>   |                           |                            |              |
| N0                        | 7                         | 5                          | 0.696        |
| N1                        | 8                         | 9                          |              |
| N2-NX                     | 1                         | 2                          |              |
| <b>Metastasis</b>         |                           |                            |              |
| No                        | 20                        | 12                         | —            |
| Yes                       | 0                         | 0                          |              |
| <b>Vascular invasion</b>  |                           |                            |              |
| No                        | 14                        | 11                         | 0.200        |
| Yes                       | 2                         | 5                          |              |
| <b>Lymphatic invasion</b> |                           |                            |              |
| No                        | 7                         | 6                          | 0.719        |
| Yes                       | 9                         | 10                         |              |

**Supplementary Table 3. Correlation between miR-1-3p expression and clinicopathologic characteristics of ESCC patients (n=32).**

| Characteristics           | miR-1-3p                  |                            | p value      |
|---------------------------|---------------------------|----------------------------|--------------|
|                           | Low expression, no. cases | High expression, no. cases |              |
| <b>Age(y)</b>             |                           |                            |              |
| <65                       | 9                         | 6                          | 0.288        |
| ≥65                       | 7                         | 10                         |              |
| <b>Gender</b>             |                           |                            |              |
| Male                      | 15                        | 13                         | 0.285        |
| Female                    | 1                         | 3                          |              |
| <b>TNM stage</b>          |                           |                            |              |
| I                         | 2                         | 4                          | 0.663        |
| II                        | 7                         | 6                          |              |
| III                       | 7                         | 6                          |              |
| <b>T classification</b>   |                           |                            |              |
| T1                        | 9                         | 9                          | <b>0.020</b> |
| T2                        | 2                         | 7                          |              |
| T3                        | 5                         | 0                          |              |
| T4                        | 0                         | 0                          |              |
| <b>N classification</b>   |                           |                            |              |
| N0                        | 6                         | 6                          | 0.822        |
| N1                        | 8                         | 9                          |              |
| N2-NX                     | 2                         | 1                          |              |
| <b>Metastasis</b>         |                           |                            |              |
| No                        | 16                        | 16                         | —            |
| Yes                       | 0                         | 0                          |              |
| <b>Vascular invasion</b>  |                           |                            |              |
| No                        | 14                        | 11                         | 0.200        |
| Yes                       | 2                         | 5                          |              |
| <b>Lymphatic invasion</b> |                           |                            |              |
| No                        | 6                         | 7                          | 0.719        |
| Yes                       | 10                        | 9                          |              |
